# Supplementary material for: Activity and stability origin of core–shell catalysts: unignorable atomic diffusion behavior
Source: Royal Society of Chemistry journal article supplement (doi:10.1039/d4sc08019j), 2025-01-01
Supplement: d4sc08019j1.pdf [file d4sc08019j1.pdf]

Electronic supplementary information (ESI)

## **Activity and stability origin of core-shell catalysts: Unignorable atomic diffusion behavior**

Yuanyuan Xue,<sup>a</sup> Letian Chen,<sup>c</sup> Lijuan Zhang,<sup>a</sup> Gengfeng Zheng,<sup>\*a</sup> Xu Zhang<sup>\*b</sup> and Zhen Zhou<sup>\*b,c</sup>

<sup>a</sup> *Laboratory of Advanced Materials, Department of Chemistry and Shanghai Key Laboratory of Molecular Catalysis and Innovative Materials, Fudan University, Shanghai 200438, China*

<sup>b</sup> *Interdisciplinary Research Center for Sustainable Energy Science and Engineering (IRC4SE<sup>2</sup>), School of Chemical Engineering, Zhengzhou University, Henan 450001, China*

<sup>c</sup> *School of Materials Science and Engineering, Institute of New Energy Material Chemistry, Renewable Energy Conversion and Storage Center (ReCast), Key Laboratory of Advanced Energy Materials Chemistry (Ministry of Education), Nankai University, Tianjin 300350, China*

\*Corresponding author. Email: [gfzheng@fudan.edu.cn](mailto:gfzheng@fudan.edu.cn) (G.F.Z.); [zzuzhangxu@zzu.edu.cn](mailto:zzuzhangxu@zzu.edu.cn) (X.Z.);

[zhouzhen@nankai.edu.cn](mailto:zhouzhen@nankai.edu.cn) (Z.Z.).

## Table of Contents

|                                              |           |
|----------------------------------------------|-----------|
| <b>Computational Procedures</b> .....        | <b>1</b>  |
| Modeling.....                                | 1         |
| Constant potential calculations.....         | 2         |
| AIMD simulations.....                        | 3         |
| <b>Experimental Procedures</b> .....         | <b>4</b>  |
| Preparation.....                             | 4         |
| Characterization.....                        | 5         |
| <b>Supplemental Figures and Tables</b> ..... | <b>6</b>  |
| Figure S1.....                               | 6         |
| Figure S2.....                               | 7         |
| Figure S3.....                               | 8         |
| Figure S4.....                               | 9         |
| Figure S5.....                               | 10        |
| Figure S6.....                               | 11        |
| Figure S7.....                               | 12        |
| Figure S8.....                               | 13        |
| Table S1.....                                | 14        |
| Table S2.....                                | 15        |
| Table S3.....                                | 16        |
| Table S4.....                                | 17        |
| Table S5.....                                | 18        |
| Table S6.....                                | 19        |
| Table S7.....                                | 20        |
| Table S8.....                                | 21        |
| Table S9.....                                | 22        |
| Table S10.....                               | 23        |
| <b>References</b> .....                      | <b>24</b> |

## Computational Procedures

### Modeling

DFT computations with spin-polarization are carried out using the Vienna Ab initio Simulation Package (VASP).<sup>1</sup> The Perdew-Burke-Ernzerhof (PBE) parametrization of the generalized gradient approximation (GGA) is used to describe the electronic exchange-correlation energies.<sup>2</sup> The dispersion correction (D3-Grimme) is employed to better describe the weak interactions.<sup>3</sup> Three layers of NiFe alloy (111) plane (mp-2213, the ratio between Fe and Ni is 1:1) and one graphene layer doped with four pyridinic N are combined to simulate NiFe@NC. The graphene layer contains 28 of C atoms and 4 of pyridinic N atoms. A vacuum space of more than 15 Å is employed along the z-axis to avoid the interaction between two periodic units. When relaxing, the bottom layer is fixed to simulate the bulk NiFe alloy. Brillouin zones are sampled by a Gamma-centered Monkhorst-Pack k-point mesh with  $2 \times 3 \times 1$  for NiFe@NC. During the structure relaxation, the setup of convergence criterion for residual force and energy are 0.03 eV/Å and  $10^{-5}$  eV, respectively. An energy cutoff of 400 eV for the plane-wave basis set is used.

To calculate the barrier for the formation of NiFe-(n-1)@FeNC from NiFe@NC, the climbing image nudged elastic band method (CINEB) method<sup>4</sup> is used to search the transition state and further the DIMER method<sup>5</sup> is adopted to obtain a more accurate energy of the transition state. Both methods adopt  $10^{-7}$  eV and 0.03 eV/Å standards for energy and force convergence, respectively. Other parameter settings are the same as the before mentioned.

## Constant potential calculations

When conducting constant potential calculations, the implicit solvent environment is presented by the VASPsol code.<sup>6,7</sup> The relative permittivity is set to 80 to model the aqueous electrolyte. The effective surface tension parameter uses 0 to neglect the cavitation energy contribution. The linearized Poisson–Boltzmann model with a Debye length of 3.0 Å mimics the compensating charge. To consider the effect of electrode potentials during ORR/OER processes, the excess charge is added to the unit cell, the value ( $\Delta n$ ) is varied from  $-2.0 e$  to  $+2.0 e$  in steps of  $0.5 e/0.25 e$  for  $\text{NiFe}_{n-1}@\text{FeNC}$ ,  $\Delta n$  is varied from  $-6.0 e$  to  $-2.0 e$  in steps of  $0.5 e$  for  $\text{Ni}_{n-1}\text{Fe}@\text{NiNC}$ , and  $\Delta n$  is varied from  $-6.0 e$  to  $0.0 e$  in steps of  $0.5 e$  for unreconstructed  $\text{NiFe}@\text{NC}$ . Then the energy ( $E$ ) of the system is related to the potential, and the relationship between  $E$  and  $\Delta n$  follows Equation 1. The electrode potential ( $U_q$ ) is referenced to the standard hydrogen electrode (SHE) according to Equation 2. Finally,  $E-U_q$  follows a quadratic function relationship (Equation 3).<sup>8</sup>

$$(1) E = E_{\text{DFT}} - \Delta n(V_{\text{sol}} + \Phi_q/e)$$

$$(2) U_q(V_{\text{SHE}}) = -4.6 \text{ V} - \Phi_q/e$$

$$(3) E = -1/2C(U_q - U_0)^2 + E_0$$

In Equation 1,  $E_{\text{DFT}}$  is the energy calculated by VASP; another term is the energy correction of the charged system, where  $V_{\text{sol}}$  refers to the electrostatic potential of the bulk solution, and  $-\Phi_q$  represents the work function. In Equation 2, 4.6 V is the work function of the  $\text{H}_2/\text{H}^+$  couple at standard conditions. In Equation 3,  $C$ ,  $U_0$ , and  $E_0$  are

the capacitance, the potential of zero charge (PZC), and the corresponding energy of the system at PZC, respectively.

The calculated ORR steps are listed as follows. The sequence of OER steps is reversed from those of ORR. The free energy changes ( $\Delta G$ ) of elementary steps are calculated as  $\Delta G = \Delta E + \Delta E_{\text{ZPE}} - T\Delta S$ , where  $\Delta E$ ,  $\Delta E_{\text{ZPE}}$ ,  $T$ , and  $\Delta S$  are the reaction energy, zero-point energies correction, temperature, and entropy change, respectively. The free energy correction of adsorbed intermediates is calculated based on the VASPKIT tool at 298.15 K.<sup>9</sup>  $\Delta E$  is calculated by the double reference method, which is potential dependent. The chemical potential of the solvated proton and electron pair is equal to  $1/2G_{\text{H}_2} + eU - 0.059\text{pH}$ .

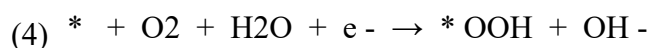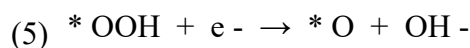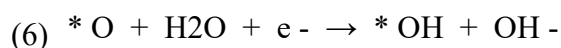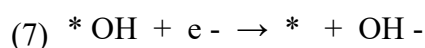

### **AIMD simulations**

To clarify the dynamic structure evolution of NiFe@NC during realistic reaction environments, we performed AIMD simulations with explicit solvent environments using VASP.<sup>1</sup> 48 water molecules (1 g cm<sup>-3</sup> of density) are introduced into the simulated system. One hydroxide is involved at the interface between the slab and the water molecules for simulating the reaction environments since M@C catalysts generally work under alkaline environments. The height of the vacuum layer is 10 Å to avoid the periodic image interaction.

The PBE parametrization of the GGA is used to describe the electronic exchange-correlation energies.<sup>2</sup> And the dispersion correction (D3-Grimme) is employed to better describe the weak interactions.<sup>3</sup> The cutoff energy is 400 eV for AIMD simulations. The “slow growth” method is adopted to obtain the free energy profile of dynamic behaviors of NiFe<sub>n-1</sub>@NC. The distance between the outermost Fe atom of NiFe<sub>n-1</sub> alloy and the O atom of hydroxide is constrained as a collective variable (denoted as  $r_{\text{Fe-O}}$ ),  $r_{\text{Fe-O}}$  is changed slowly from 3.2 Å to 2.0 Å with a change of -0.0004 Å every step. The step is set to be 1 fs. The simulation is conducted under an NVT ensemble at a constant 300 K using a Nose-Hoover thermostat.<sup>10,11</sup> Only the gamma point is sampled at the first Brillouin zone when simulating since the simulated system is relatively huge.

The free energy barriers and free energy changes directly obtained from the AIMD simulation are under changeable potentials, due to the limited size of the simulated system. Thus, the constant potential correction method<sup>12</sup> and charge-extrapolation method<sup>13</sup> are used to calculate the free energy barriers and free energy changes of the dynamic process under the working potential. Bader charges of the slabs are calculated to analyze the internal charge transfers of the periodic cells.

## **Experimental Procedures**

### **Preparation**

Iron acetate (Fe(CH<sub>3</sub>COO)<sub>2</sub>), nickel acetate titrate (Ni(CH<sub>3</sub>COO)<sub>2</sub>·4H<sub>2</sub>O), melamine (C<sub>3</sub>H<sub>6</sub>N<sub>6</sub>), and glucose (C<sub>6</sub>H<sub>12</sub>O<sub>6</sub>) are purchased and directly used in the preparation. Firstly, 0.05 g of iron acetate, 0.07g of nickel acetate titrate, 6 g of melamine, and 0.5 g of glucose are mixed in 100 ml of deionized water, and the suspension is stirred

magnetically for 12 h. Then the suspension is dried at 80 °C. After that, the dried powder is pyrolyzed at 900 °C for 3h under an Ar atmosphere, the rate from room temperature to 900 °C is 5 °C per minute.

### **Characterization**

The prepared sample is characterized by an X-ray diffractometer (Bruker, D8 Discover) with Cu K<sub>α</sub> radiation, a field-emission transmission electron microscope (JEOL, JEM-2100F), an X-ray photoelectron spectroscope (XPS, Thermo, Scientific K-Alpha), and a spherical-aberration corrected scanning transmission electron microscope (JEOL, JEM-ARM300F) equipped with an X-ray energy spectroscope.

## Supplemental Figures and Tables

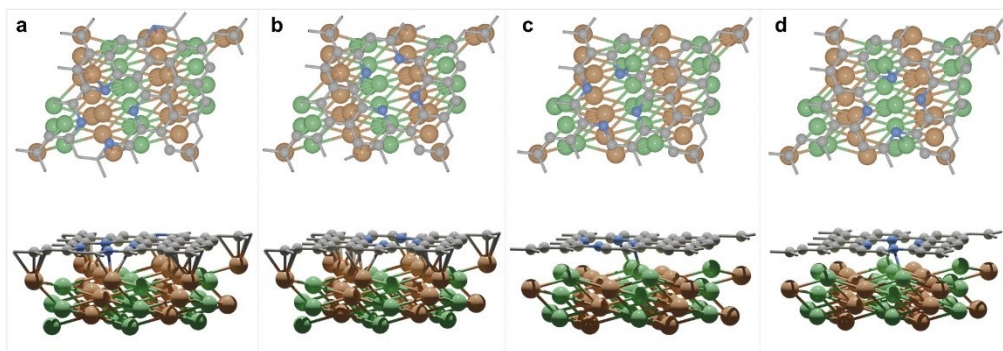

**Fig. S1** (a–d) Top views and side views of (a) NiFe\_Fe\_up@NC-A, (b) NiFe\_Fe\_up@NC-B, (c) NiFe\_Ni\_up@NC-A, (d) NiFe\_Ni\_up@NC-B. Here A and B represent two kinds of locations for pyridinic nitrogen atoms. Colors: yellow, Fe; gray, Ni; brown, C; pale blue, N. The color representations below are the same as there.



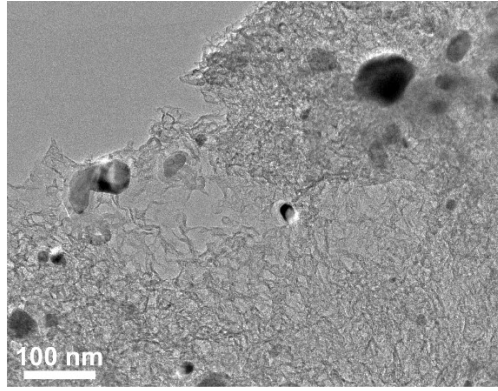

**Fig. S2** Transmission electron microscopy (TEM) image of NiFe@NC-sys.

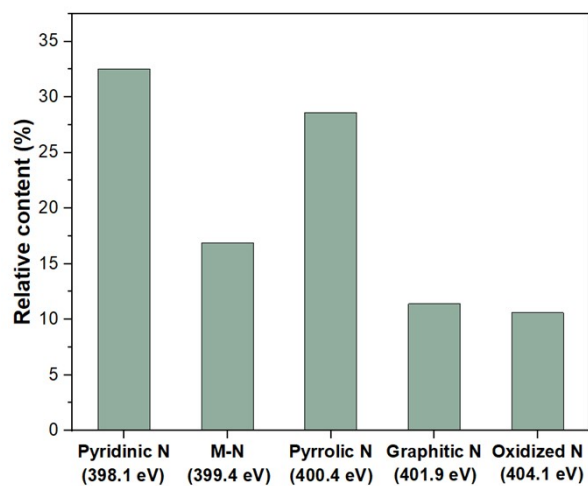

**Fig. S3** The relative content of nitrogen species within NiFe@NC-sys determined by XPS. The binding energies of these nitrogen species are shown in the brackets.

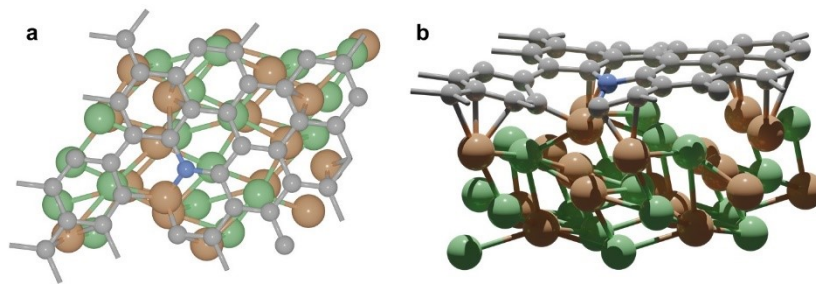

**Fig. S4** Top view (a) and side view (b) of unreconstructed NiFe@NC.

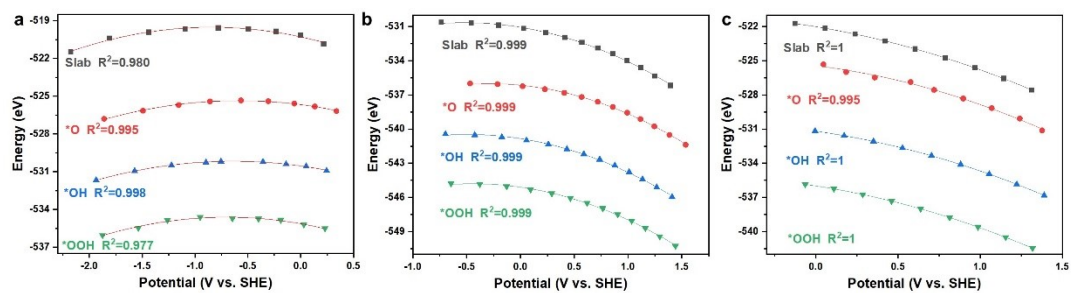

**Fig. S5** (a–c) The constant potential calculation data and quadratic relationship fitting plots of (a) NiFe<sub>n-1</sub>@FeNC, (b) unreconstructed NiFe@NC, and (c) Ni<sub>n-1</sub>Fe@NiNC.

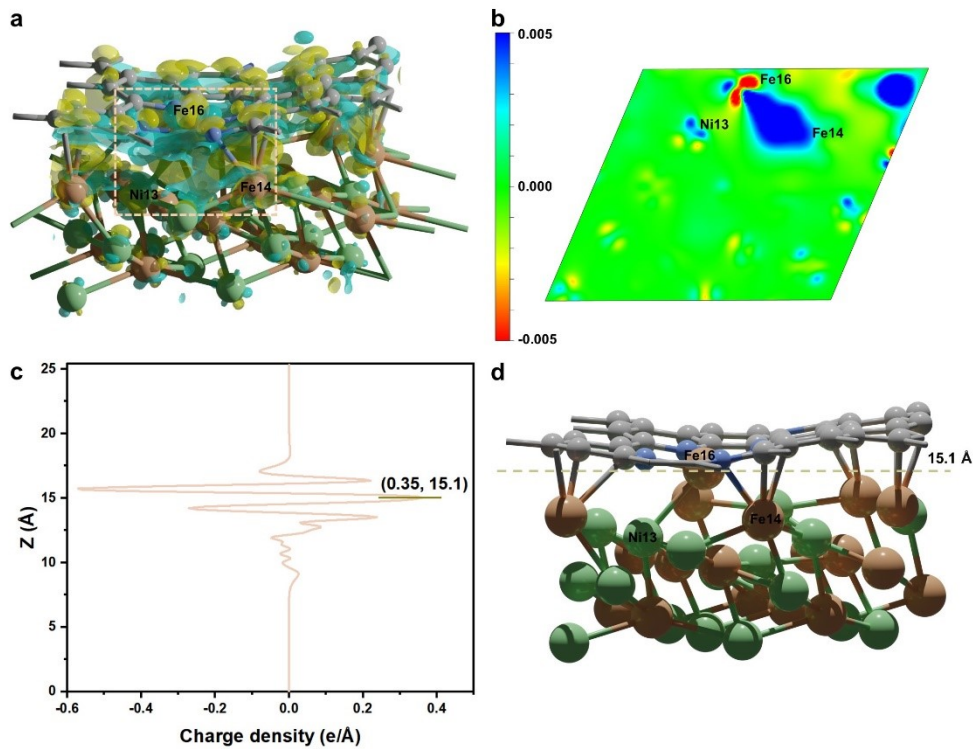

**Fig. S6** (a) Charge density differential figure of  $\text{NiFe}_{n-1}@FeNC$ . Yellow region means the increase of charge density and cyan color means the decrease of charge density. It can be clearly seen the electron transfer from the inner  $\text{NiFe}_{n-1}$  alloy to the outer N-doped carbon shell, especially to the Fe-N-C site. (b) Two-dimensional slice of the three-dimensional differential charge density of  $\text{NiFe}_{n-1}@FeNC$ . The electrons of the outermost Ni and Fe atoms within  $\text{NiFe}_{n-1}$  alloy are transferred to the Fe-N-C site. (c) One-dimensional differential charge density (along the vacuum layer direction) of  $\text{NiFe}_{n-1}@FeNC$ . The charge density of the Fe atom from the Fe-N-C site increases by  $0.35 \text{ e}/\text{\AA}$ . (d) The structure of  $\text{NiFe}_{n-1}@FeNC$ .

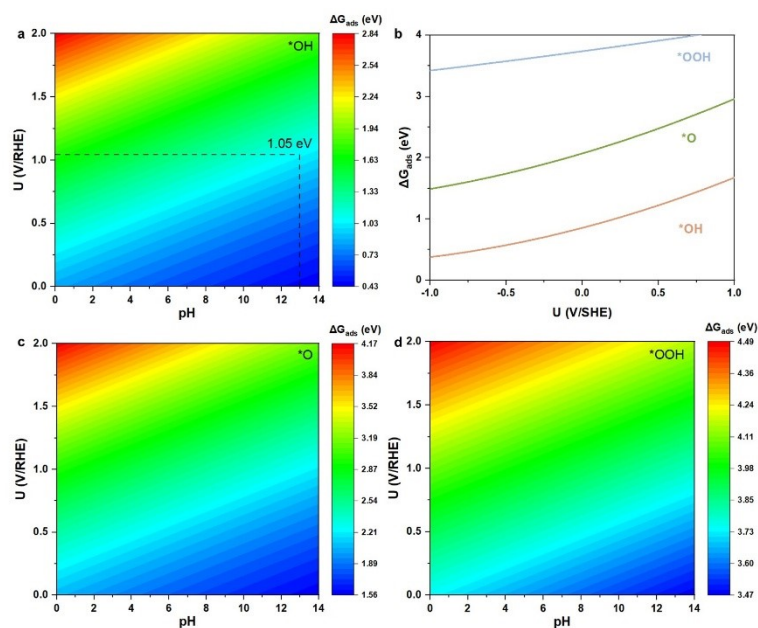

**Fig. S7** (a) The pH-dependent and potential-dependent contour plot of adsorption energy of \*OH on NiFe<sub>n-1</sub>@FeNC. (b) Adsorption energies of \*OOH, \*O, and \*OH as a function of the applied potential on NiFe<sub>n-1</sub>@FeNC. (c) The pH-dependent and potential-dependent contour plot of adsorption energy of \*O on NiFe<sub>n-1</sub>@FeNC. (d) The pH-dependent and potential-dependent contour plot of adsorption energy of \*OOH on NiFe<sub>n-1</sub>@FeNC.

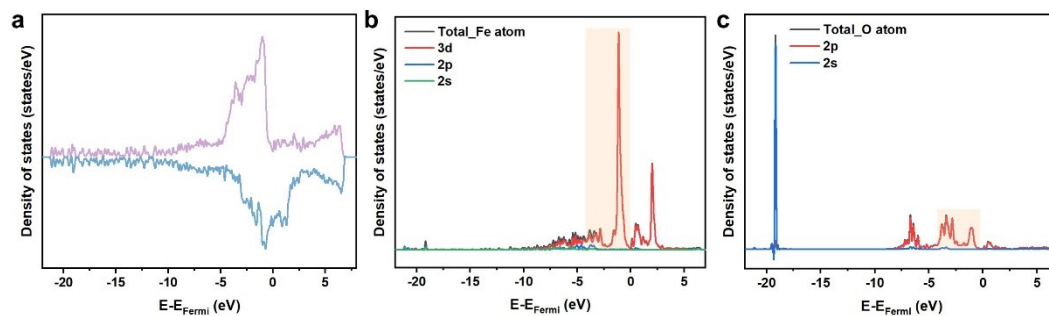

**Fig. S8** (a) The spin-up and spin-down total density of states of the final structure of stage 1, the structure is inserted in Fig. 5b. (b) PDOS of the Fe atom. (c) PDOS of the O atom. The interaction between the O atom from \*OH and the Fe atom from the Fe-N-C site is mainly from the contribution of Fe 3d orbitals and O 2p orbitals.

**Table S1.** The element content of NiFe@NC-sys.

| Element | Atomic percent (%) |
|---------|--------------------|
| Ni      | 0.64               |
| Fe      | 0.80               |
| C       | 92.85              |
| N       | 5.71               |



**Table S2.** The Gibbs free energies of H<sub>2</sub>(g), O<sub>2</sub>(g) and H<sub>2</sub>O(l). Since O<sub>2</sub> is poorly described in DFT calculations, the free energy of O<sub>2</sub> is calculated by  $G_{\text{O}_2} = 2G_{\text{H}_2\text{O}} - 2G_{\text{H}_2} + 4.921$  eV. The DFT energies ( $E_{\text{DFT}}$ ) of H<sub>2</sub> and H<sub>2</sub>O are calculated in a 10 Å × 10 Å × 10 Å unit cell in vacuum.

|                      | Pressure (atm) | Temperature (K) | $E_{\text{DFT}}$ (eV) | $\Delta G$ (eV) | G (eV)  |
|----------------------|----------------|-----------------|-----------------------|-----------------|---------|
| O <sub>2</sub> (g)   | 1              | 298.15          |                       |                 | -9.910  |
| H <sub>2</sub> (g)   | 1              | 298.15          | -6.759                | -0.047          | -6.806  |
| H <sub>2</sub> O (l) | 0.035          | 298.15          | -14.219               | -0.002          | -14.221 |

**Table S3.** The fitted E (eV)-U (V vs. SHE) quadratic relationships of NiFe<sub>n-1</sub>@FeNC.

|      | Fitted E-U quadratic relationships |
|------|------------------------------------|
| Slab | $E = -520.282 - 1.810U - 1.074U^2$ |
| *OH  | $E = -530.541 - 1.161U - 0.902U^2$ |
| *O   | $E = -525.666 - 1.075U - 0.918U^2$ |
| *OOH | $E = -535.129 - 1.475U - 1.054U^2$ |

**Table S4.** Fitted E (eV)-U (V vs. SHE) quadratic relationships of unreconstructed

NiFe@NC.

|      | Fitted E-U quadratic relationships |
|------|------------------------------------|
| Slab | $E = -1.476U^2 - 1.546U - 531.056$ |
| *OH  | $E = -1.493U^2 - 1.471U - 540.836$ |
| *O   | $E = -1.602U^2 - 0.909U - 536.148$ |
| *OOH | $E = -1.518U^2 - 1.349U - 545.102$ |

**Table S5.** The ORR and OER performances of NiFe<sub>n-1</sub>@FeNC and similar catalysts.

| Catalyst                                  | Atom ratio | ORR onset potential   | OER onset potential   | pH | Reference                                         |
|-------------------------------------------|------------|-----------------------|-----------------------|----|---------------------------------------------------|
| NiFe <sub>n-1</sub> @FeNC                 | Ni:Fe=1:1  | 1.05 V <sub>RHE</sub> | 1.37 V <sub>RHE</sub> | 13 | This work                                         |
| NiFe <sub>n-1</sub> @FeNC                 | Ni:Fe=1:1  | 0.90 V <sub>RHE</sub> | 1.40 V <sub>RHE</sub> | 14 | This work                                         |
| NiFe@NC <sub>x</sub>                      | Ni:Fe=1:2  | 1.03 V <sub>RHE</sub> | 1.46 V <sub>RHE</sub> | 13 | ACS Catal.<br>2016, 6, 6335                       |
| FeNi@NC                                   | Ni:Fe=1:1  | 0.97 V <sub>RHE</sub> | -                     | 13 | Chin. J. Catal.<br>2024, 58, 206                  |
| NiFe@NBCNT                                | Ni:Fe=1:1  | 1.03 V <sub>RHE</sub> | -                     | 13 | ACS Appl.<br>Mater. Interfaces<br>2018, 10, 26178 |
| Ni <sub>50</sub> Fe <sub>50</sub> @N-CNTs | Ni:Fe=1:1  | 0.93 V <sub>RHE</sub> | -                     | 14 | ChemCatChem<br>2019, 11, 5994                     |

**Table S6.** The ORR performances of NiFe<sub>n-1</sub>@FeNC and pyridinic FeN<sub>4</sub>C.

| Catalyst                     | ORR onset potential   | pH | Reference                                   |
|------------------------------|-----------------------|----|---------------------------------------------|
| NiFe <sub>n-1</sub> @FeNC    | 1.05 V <sub>RHE</sub> | 13 | This work                                   |
| pyridinic FeN <sub>4</sub> C | 0.32 V <sub>RHE</sub> | 13 | J. Am. Chem. Soc. 2022,<br>144, 18144–18152 |

**Table S7.** Fitted E (eV)-U (V vs. SHE) quadratic relationships of Ni<sub>n-1</sub>Fe@NiNC.

|      | Fitted E-U quadratic relationships |
|------|------------------------------------|
| Slab | $E = -1.408U^2 - 2.375U - 522.008$ |
| *OH  | $E = -1.444U^2 - 2.049U - 531.185$ |
| *O   | $E = -1.672U^2 - 1.734U - 525.440$ |
| *OOH | $E = -1.459U^2 - 2.225U - 535.990$ |

**Table S8.** The calculated charges ( $q$ ) and work functions ( $\Phi$ ) of the initial states (is), transition states (ts), and final states (fs) during stage 1 and stage 2 of AIMD simulation. The charges are obtained by calculating the Bader charges of the corresponding structures. All parameters are needed in the constant corrections and charge-extrapolations.

|         | $q_{\text{is}}$ (e) | $q_{\text{ts}}$ (e) | $q_{\text{fs}}$ (e) | $\Phi_{\text{is}}$ (eV) | $\Phi_{\text{ts}}$ (eV) | $\Phi_{\text{fs}}$ (eV) |
|---------|---------------------|---------------------|---------------------|-------------------------|-------------------------|-------------------------|
| Stage 1 | 0.26                | 0.72                | 0.77                | 4.43                    | 4.18                    | 4.37                    |
| Stage 2 | 0.77                | 0.69                | 0.84                | 4.37                    | 4.49                    | 4.86                    |

**Table S9.** The free energy changes and barriers of stage 1 and stage 2 of AIMD simulation,  $\Delta E$  means the values are obtained from the constant charge calculations (AIMD simulation),  $\Delta E'$  means the values are obtained from the constant corrections. According to the constant potential correction method,  $\Delta E' = \Delta E + 0.5 \cdot \Delta q \cdot \Delta \Phi$ ,  $\Delta E_{\text{corr}} = 0.5 \cdot \Delta q \cdot \Delta \Phi$ . All  $E$  and  $\Phi$  are listed in eV,  $q$  in the atomic unit  $t$ ,  $|e|$ .

|         | $\Delta q(\text{is} \rightarrow \text{ts})$ | $\Delta \Phi(\text{is} \rightarrow \text{ts})$ | $\Delta q(\text{is} \rightarrow \text{fs})$ | $\Delta \Phi(\text{is} \rightarrow \text{fs})$ | $\Delta E_{\text{corr}}(\text{is} \rightarrow \text{ts})$ | $\Delta E_{\text{corr}}(\text{is} \rightarrow \text{fs})$ | $\Delta E(\text{is} \rightarrow \text{ts})$ | $\Delta E(\text{is} \rightarrow \text{fs})$ | $\Delta E'(\text{is} \rightarrow \text{ts})$ | $\Delta E'(\text{is} \rightarrow \text{fs})$ |
|---------|---------------------------------------------|------------------------------------------------|---------------------------------------------|------------------------------------------------|-----------------------------------------------------------|-----------------------------------------------------------|---------------------------------------------|---------------------------------------------|----------------------------------------------|----------------------------------------------|
| Stage 1 | 0.46                                        | -0.25                                          | 0.51                                        | -0.06                                          | -0.06                                                     | -0.02                                                     | 0.24                                        | 0.13                                        | 0.18                                         | 0.11                                         |
| Stage 2 | -0.08                                       | 0.12                                           | 0.07                                        | 0.49                                           | 0.00                                                      | 0.02                                                      | 0.19                                        | 0.16                                        | 0.19                                         | 0.18                                         |



**Table S10.** The free energy changes and barriers of stage 1 and stage 2 of AIMD simulation under 0  $V_{\text{RHE}}$ , 0.8  $V_{\text{RHE}}$ , and 1.5  $V_{\text{RHE}}$  (pH=14). According to the charge-extrapolation method,  $\Delta E'' = \Delta E' - \Delta q(\Phi - \Phi_{\text{is}})$ .  $\Phi = 4.57$  under 0.8  $V_{\text{RHE}}$  at pH=14, the absolute potential of SHE is -4.6 V. All E and  $\Phi$  are listed in eV.

|         | $\Delta E_0''(\text{is} \rightarrow \text{ts})$ | $\Delta E_0''(\text{is} \rightarrow \text{fs})$ | $\Delta E_{0.8}''(\text{is} \rightarrow \text{ts})$ | $\Delta E_{0.8}''(\text{is} \rightarrow \text{fs})$ | $\Delta E_{1.5}''(\text{is} \rightarrow \text{ts})$ | $\Delta E_{1.5}''(\text{is} \rightarrow \text{fs})$ |
|---------|-------------------------------------------------|-------------------------------------------------|-----------------------------------------------------|-----------------------------------------------------|-----------------------------------------------------|-----------------------------------------------------|
| Stage 1 | 0.48                                            | 0.45                                            | 0.12                                                | 0.04                                                | -0.21                                               | -0.32                                               |
| Stage 2 | 0.14                                            | 0.22                                            | 0.20                                                | 0.17                                                | 0.26                                                | 0.12                                                |

## References

- 1 G. Kresse and J. Furthmüller, *Comput. Mater. Sci.*, 1996, **6**, 15-50.
- 2 J. P. Perdew, K. Burke and M. Ernzerhof, *Phys. Rev. Lett.*, 1996, **77**, 3865-3868.
- 3 S. Grimme, J. Antony, S. Ehrlich and H. Krieg, *J. Chem. Phys.*, 2010, **132**, 154104.
- 4 G. Henkelman, B. P. Uberuaga and H. Jónsson, *J. Chem. Phys.*, 2000, **113**, 9901-9904.
- 5 P. Xiao, D. Sheppard, J. Rogal and G. Henkelman, *J. Chem. Phys.*, 2014, **140**, 174104.
- 6 K. Mathew, V. S. C. Kolluru, S. Mula, S. N. Steinmann and R. G. Hennig, *J. Chem. Phys.*, 2019, **151**, 234101.
- 7 K. Mathew, R. Sundararaman, K. Letchworth-Weaver, T. A. Arias and R. G. Hennig, *J. Chem. Phys.*, 2014, **140**, 084106.
- 8 Z. Duan and G. Henkelman, *ACS Catal.*, 2019, **9**, 5567-5573.
- 9 V. Wang, N. Xu, J.-C. Liu, G. Tang and W.-T. Geng, *Comput. Phys. Commun.*, 2021, **267**, 108033.
- 10 S. Nosé, *J. Chem. Phys.*, 1984, **81**, 511-519.
- 11 W. G. Hoover, *Phys. Rev. A*, 1985, **31**, 1695-1697.
- 12 K. Chan and J. K. Nørskov, *J. Phys. Chem. Lett.*, 2015, **6**, 2663-2668.
- 13 K. Chan and J. K. Nørskov, *J. Phys. Chem. Lett.*, 2016, **7**, 1686-1690.
